# Supplementary material
Source: publisher site journal article supplement (https://www.dovepress.com/article/106527)
Supplement: Supplementary file 1 [file get_supplementary_file.php]

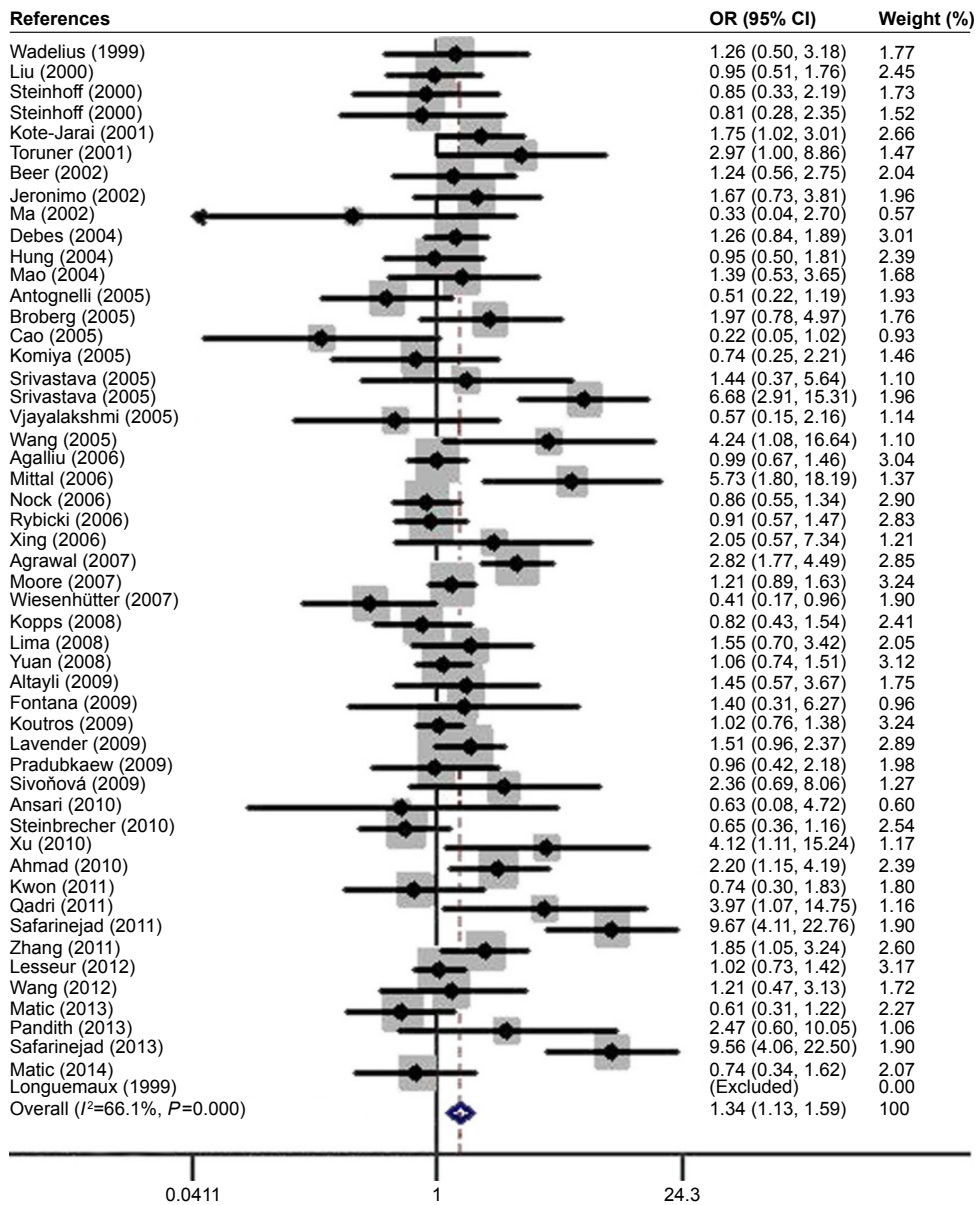

**Figure S1** The forest plot of *GSTP1* (rs1695 A>G) polymorphism (GG vs AA) and urinary system cancer susceptibility.

**Note:** Weights are from random-effects analysis.

**Abbreviations:** CI, confidence intervals; OR, odds ratio.

**Supplemental Table 1** Characteristics of the 51 studies included in the Meta-analysis

| Author                     | Years | Ethnicity          | Cancer type | Total cases | Total Con. | AA    |      | AG    |      | GG    |      | AA & AG |      | AG & GG |      |
|----------------------------|-------|--------------------|-------------|-------------|------------|-------|------|-------|------|-------|------|---------|------|---------|------|
|                            |       |                    |             |             |            | Cases | Con. | Cases | Con. | Cases | Con. | Cases   | Con. | Cases   | Con. |
| Agalliu <sup>1</sup>       | 2006  | Caucasian, African | PCa         | 589         | 538        | 260   | 227  | 261   | 251  | 68    | 60   | 521     | 478  | 329     | 311  |
| Agrawal <sup>2</sup>       | 2007  | Asian              | PCa         | 184         | 569        | 87    | 362  | 57    | 148  | 40    | 59   | 144     | 510  | 97      | 207  |
| Pandith <sup>3</sup>       | 2013  | Asian              | BC          | 180         | 210        | 129   | 159  | 45    | 48   | 6     | 3    | 174     | 207  | 51      | 51   |
| Antognelli <sup>4</sup>    | 2005  | Caucasian          | PCa         | 384         | 360        | 172   | 220  | 204   | 120  | 8     | 20   | 376     | 340  | 212     | 140  |
| Rybicki <sup>5</sup>       | 2006  | Caucasian, African | PCa         | 637         | 244        | 239   | 82   | 310   | 129  | 88    | 33   | 549     | 211  | 398     | 162  |
| Lesseur <sup>6</sup>       | 2012  | Caucasian          | BC          | 658         | 928        | 294   | 411  | 289   | 414  | 75    | 103  | 583     | 825  | 364     | 517  |
| Liu <sup>7</sup>           | 2000  | Caucasian          | RCC         | 130         | 491        | 58    | 213  | 56    | 216  | 16    | 62   | 114     | 429  | 72      | 278  |
| Debes <sup>8</sup>         | 2004  | Caucasian          | PCa         | 425         | 482        | 162   | 184  | 194   | 236  | 69    | 62   | 356     | 420  | 263     | 298  |
| Kwon <sup>9</sup>          | 2011  | Asian              | PCa         | 166         | 327        | 117   | 209  | 42    | 101  | 7     | 17   | 159     | 310  | 49      | 118  |
| Mittal <sup>10</sup>       | 2006  | Caucasian          | PCa         | 54          | 105        | 16    | 55   | 28    | 44   | 10    | 6    | 44      | 99   | 38      | 50   |
| Altayli <sup>11</sup>      | 2009  | Caucasian          | BC          | 135         | 128        | 75    | 62   | 46    | 58   | 14    | 8    | 121     | 120  | 60      | 66   |
| Matic <sup>12</sup>        | 2014  | Caucasian          | BC          | 143         | 114        | 62    | 49   | 65    | 48   | 16    | 17   | 127     | 97   | 81      | 65   |
| Mao <sup>13</sup>          | 2004  | Unknown            | PCa         | 122         | 135        | 56    | 70   | 56    | 56   | 10    | 9    | 112     | 126  | 66      | 65   |
| Wang <sup>14</sup>         | 2012  | Caucasian          | RCC         | 207         | 236        | 143   | 173  | 55    | 54   | 9     | 9    | 198     | 227  | 64      | 63   |
| Hung <sup>15</sup>         | 2004  | Caucasian          | BC          | 201         | 214        | 103   | 112  | 77    | 78   | 21    | 24   | 180     | 190  | 98      | 102  |
| Vjayalakshmi <sup>16</sup> | 2005  | Asian              | PCa         | 75          | 100        | 49    | 42   | 22    | 52   | 4     | 6    | 71      | 94   | 26      | 58   |
| Jeronimo <sup>17</sup>     | 2002  | Caucasian          | PCa         | 105         | 141        | 45    | 61   | 44    | 67   | 16    | 13   | 89      | 128  | 60      | 80   |
| Yuan <sup>18</sup>         | 2008  | Caucasian          | BC          | 657         | 684        | 301   | 284  | 274   | 327  | 82    | 73   | 575     | 611  | 356     | 400  |
| Broberg <sup>19</sup>      | 2005  | Caucasian          | BC          | 61          | 155        | 24    | 71   | 27    | 69   | 10    | 15   | 51      | 140  | 37      | 84   |
| Komiya <sup>20</sup>       | 2005  | Asian              | PCa         | 187         | 291        | 143   | 212  | 39    | 69   | 5     | 10   | 182     | 281  | 44      | 79   |
| Kopps <sup>21</sup>        | 2008  | Caucasian          | BC          | 143         | 196        | 66    | 82   | 56    | 82   | 21    | 32   | 122     | 164  | 77      | 114  |
| Kote-Jarai <sup>22</sup>   | 2001  | Caucasian          | PCa         | 273         | 273        | 117   | 140  | 115   | 105  | 41    | 28   | 232     | 245  | 156     | 133  |
| Koutros <sup>23</sup>      | 2009  | Unknown            | PCa         | 1086        | 1098       | 489   | 531  | 500   | 464  | 97    | 103  | 989     | 995  | 597     | 567  |
| Nock <sup>24</sup>         | 2006  | Caucasian          | PCa         | 439         | 479        | 175   | 207  | 222   | 214  | 42    | 58   | 397     | 421  | 264     | 272  |
| Moore <sup>25</sup>        | 2007  | Caucasian          | RCC         | 910         | 1232       | 425   | 577  | 390   | 548  | 95    | 107  | 815     | 1125 | 485     | 655  |
| Lima <sup>26</sup>         | 2008  | Unknown            | PCa         | 125         | 100        | 65    | 55   | 38    | 33   | 22    | 12   | 103     | 88   | 60      | 45   |

|                            |      |           |     |     |     |     |     |    |     |    |     |     |     |     |     |
|----------------------------|------|-----------|-----|-----|-----|-----|-----|----|-----|----|-----|-----|-----|-----|-----|
| Longueaux <sup>27</sup>    | 1999 | Caucasian | RCC | 173 | 211 | 121 | 146 | 52 | 65  | 0  | 0   | 173 | 211 | 52  | 65  |
| Fontana <sup>28</sup>      | 2009 | Caucasian | BC  | 51  | 45  | 20  | 28  | 27 | 13  | 4  | 4   | 47  | 41  | 31  | 17  |
| Ma <sup>29</sup>           | 2002 | Asian     | BC  | 61  | 179 | 33  | 110 | 27 | 59  | 1  | 10  | 60  | 169 | 28  | 69  |
| Matic <sup>30</sup>        | 2013 | Caucasian | BC  | 201 | 122 | 84  | 49  | 95 | 52  | 22 | 21  | 179 | 101 | 117 | 73  |
| Lavender <sup>31</sup>     | 2009 | African   | PCa | 190 | 572 | 55  | 186 | 85 | 274 | 50 | 112 | 140 | 460 | 135 | 386 |
| Pradubkaew <sup>32</sup>   | 2009 | Unknown   | BC  | 139 | 278 | 94  | 153 | 35 | 108 | 10 | 17  | 129 | 261 | 45  | 125 |
| Qadri <sup>33</sup>        | 2011 | Asian     | PCa | 50  | 78  | 26  | 59  | 17 | 15  | 7  | 4   | 43  | 74  | 24  | 19  |
| Zhang <sup>34</sup>        | 2011 | Asian     | BC  | 200 | 200 | 83  | 92  | 72 | 81  | 45 | 27  | 155 | 173 | 117 | 108 |
| Safarinejad <sup>35</sup>  | 2011 | Asian     | PCa | 168 | 236 | 54  | 174 | 90 | 54  | 24 | 8   | 144 | 228 | 114 | 62  |
| Safarinejad <sup>36</sup>  | 2013 | Caucasian | BC  | 166 | 332 | 54  | 172 | 88 | 152 | 24 | 8   | 142 | 324 | 112 | 160 |
| Ansari <sup>37</sup>       | 2010 | Asian     | PCa | 65  | 65  | 40  | 25  | 23 | 38  | 2  | 2   | 63  | 63  | 25  | 40  |
| Srivastava <sup>38</sup>   | 2005 | Asian     | PCa | 127 | 144 | 46  | 83  | 77 | 56  | 4  | 5   | 123 | 139 | 81  | 61  |
| Sivoňová <sup>39</sup>     | 2009 | Caucasian | PCa | 129 | 228 | 56  | 110 | 67 | 113 | 6  | 5   | 123 | 223 | 73  | 118 |
| Srivastava <sup>40</sup>   | 2005 | Caucasian | BC  | 106 | 370 | 33  | 191 | 58 | 166 | 15 | 13  | 91  | 357 | 73  | 179 |
| Steinbrecher <sup>41</sup> | 2010 | Caucasian | PCa | 238 | 492 | 125 | 216 | 95 | 228 | 18 | 48  | 220 | 444 | 113 | 276 |
| Steinhoff <sup>ff42</sup>  | 2000 | Caucasian | BC  | 135 | 127 | 67  | 70  | 59 | 46  | 9  | 11  | 126 | 116 | 68  | 57  |
| Steinhoff <sup>ff42</sup>  | 2000 | Caucasian | PCa | 91  | 127 | 47  | 70  | 38 | 46  | 6  | 11  | 85  | 116 | 44  | 57  |
| Ahmad <sup>43</sup>        | 2011 | Asian     | RCC | 196 | 250 | 71  | 126 | 99 | 103 | 26 | 21  | 170 | 229 | 125 | 124 |
| Beer <sup>44</sup>         | 2002 | Caucasian | PCa | 173 | 223 | 109 | 146 | 51 | 63  | 13 | 14  | 160 | 209 | 64  | 77  |
| Toruner <sup>45</sup>      | 2001 | Caucasian | BC  | 121 | 121 | 67  | 83  | 42 | 33  | 12 | 5   | 109 | 116 | 54  | 38  |
| Wadelius <sup>46</sup>     | 1999 | Caucasian | PCa | 143 | 120 | 75  | 71  | 56 | 40  | 12 | 9   | 131 | 111 | 68  | 49  |
| Cao <sup>47</sup>          | 2005 | Caucasian | BC  | 145 | 170 | 77  | 93  | 66 | 66  | 2  | 11  | 143 | 159 | 68  | 77  |
| Wiesenhütter <sup>48</sup> | 2007 | Caucasian | RCC | 99  | 325 | 49  | 134 | 43 | 144 | 7  | 47  | 92  | 278 | 50  | 191 |
| Xing <sup>49</sup>         | 2006 | Asian     | BC  | 108 | 112 | 59  | 69  | 42 | 39  | 7  | 4   | 101 | 108 | 49  | 43  |
| Xu <sup>50</sup>           | 2010 | Asian     | PCa | 103 | 103 | 68  | 70  | 23 | 30  | 12 | 3   | 91  | 100 | 35  | 33  |
| Wang <sup>51</sup>         | 2005 | Asian     | PCa | 108 | 90  | 41  | 58  | 58 | 29  | 9  | 3   | 99  | 87  | 67  | 32  |

PCa, prostate cancer; BC, bladder cancer; RCC, renal cell carcinoma.

## References

1. Agalliu I, Langeberg WJ, Lampe JW, Salinas CA, Stanford JL. Glutathione S-transferase M1, T1, and P1 polymorphisms and prostate cancer risk in middle-aged men. *Prostate*. 2006;66(2):146-156.
2. Agrawal S, Tripathi G, Khan F, Sharma R, Baburaj VP. Relationship between GSTs gene polymorphism and susceptibility to end stage renal disease among North Indians. *Ren Fail*. 2007;29(8):947-953.
3. Pandith AA, Lateef A, Shahnawaz S, et al. GSTP1 gene Ile105Val polymorphism causes an elevated risk for bladder carcinogenesis in smokers. *Asian Pac J Cancer Prev*. 2013;14(11):6375-6378.
4. Antognelli C, Mearini L, Talesa VN, Giannantoni A, Mearini E. Association of CYP17, GSTP1, and PON1 polymorphisms with the risk of prostate cancer. *Prostate*. 2005;63(3):240-251.
5. Rybicki BA, Neslund-Dudas C, Nock NL, et al. Prostate cancer risk from occupational exposure to polycyclic aromatic hydrocarbons interacting with the GSTP1 Ile105Val polymorphism. *Cancer Detect Prev*. 2006;30(5):412-422.
6. Lesueur C, Gilbert-Diamond D, Andrew AS, et al. A case-control study of polymorphisms in xenobiotic and arsenic metabolism genes and arsenic-related bladder cancer in New Hampshire. *Toxicol Lett*. 2012;210(1):100-106.
7. Liu K, Zhang L, Chen J, Hu Z, Cai G, Hong Q. Association of MeCP2 (rs2075596, rs2239464) genetic polymorphisms with systemic lupus erythematosus: a meta-analysis. *Lupus*. 2013;22(9):908-918.

8. Debes JD, Yokomizo A, McDonnell SK, et al. Glutathione-S-transferase P1 polymorphism I105V in familial and sporadic prostate cancer. *Cancer Genet Cytogenet.* 2004;155(1):82-86.
9. Kwon DD, Lee JW, Han DY, et al. Relationship between the Glutathione-S-Transferase P1, M1, and T1 Genotypes and Prostate Cancer Risk in Korean Subjects. *Korean J Urol.* 2011;52(4):247-252.
10. Mittal RD MD, Mandhani A, et al. Evaluating polymorphic status of glutathione-S-transferase genes in blood and tissue samples of prostate cancer patients. *Asian Pacific J Cancer Prev.* 2006;7(3):444-446.
11. Altayli E, Gunes S, Yilmaz AF, Goktas S, Bek Y. CYP1A2, CYP2D6, GSTM1, GSTP1, and GSTT1 gene polymorphisms in patients with bladder cancer in a Turkish population. *Int Urol Nephrol.* 2009;41(2):259-266.
12. Matic MG, Coric VM, Savic-Radojevic AR, et al. Does occupational exposure to solvents and pesticides in association with glutathione S-transferase A1, M1, P1, and T1 polymorphisms increase the risk of bladder cancer? The Belgrade case-control study. *PLoS One.* 2014;9(6):e99448.
13. Mao GE, Morris G, Lu QY, et al. Glutathione S-transferase P1 Ile105Val polymorphism, cigarette smoking and prostate cancer. *Cancer Detect Prev.* 2004;28(5):368-374.
14. Wang G, Hou J, Ma L, et al. Risk factor for clear cell renal cell carcinoma in Chinese population: a case-control study. *Cancer Epidemiol.* 2012;36(2):177-182.

15. Hung RJ, Boffetta P, Brennan P, et al. GST, NAT, SULT1A1, CYP1B1 genetic polymorphisms, interactions with environmental exposures and bladder cancer risk in a high-risk population. *Int J Cancer*. 2004;110(4):598-604.
16. Vijayalakshmi K VV, Krishnan M, et al. Polymorphisms at GSTM1 and GSTP1 gene loci and risk of prostate cancer in a South Indian population. *Asian Pacific J Cancer Prev*. 2005;6(3):309-314.
17. Jeronimo C VG, Henrique R, et al. I105V Polymorphism and promoter methylation of the GSTP1 Gene in Prostate Adenocarcinoma. *Cancer Epidemio Biomarkers Prev*. 2002;11(5):445-450.
18. Yuan JM, Chan KK, Coetzee GA, et al. Genetic determinants in the metabolism of bladder carcinogens in relation to risk of bladder cancer. *Carcinogenesis*. 2008;29(7):1386-1393.
19. Broberg K, Bjork J, Paulsson K, Hoglund M, Albin M. Constitutional short telomeres are strong genetic susceptibility markers for bladder cancer. *Carcinogenesis*. 2005;26(7):1263-1271.
20. Komiya Y, Tsukino H, Nakao H, Kuroda Y, Imai H, Katoh T. Human glutathione S-transferase A1, T1, M1, and P1 polymorphisms and susceptibility to prostate cancer in the Japanese population. *J Cancer Res Clin Oncol*. 2005;131(4):238-242.
21. Kopps S, Angeli-Greaves M, Blaszkewicz M, et al. Glutathione S-transferase P1 ILE105Val polymorphism in occupationally exposed bladder cancer cases. *J Toxicol Environ Health A*. 2008;71(13-14):898-901.
22. Kote-Jarai Z, Easton D, Edwards SM, et al. Relationship between glutathione S-transferase M1, P1 and T1 polymorphisms and early

onset prostate cancer. *Pharmacogenetics*. 2001;11(4):325-330.

23. Koutros S, Berndt SI, Sinha R, et al. Xenobiotic metabolizing gene variants, dietary heterocyclic amine intake, and risk of prostate cancer. *Cancer Res*. 2009;69(5):1877-1884.
24. Nock NL, Liu X, Cicek MS, et al. Polymorphisms in polycyclic aromatic hydrocarbon metabolism and conjugation genes, interactions with smoking and prostate cancer risk. *Cancer Epidemio Biomarkers Prev*. 2006;15(4):756-761.
25. Moore LE, Brennan P, Karami S, et al. Glutathione S-transferase polymorphisms, cruciferous vegetable intake and cancer risk in the Central and Eastern European Kidney Cancer Study. *Carcinogenesis*. 2007;28(9):1960-1964.
26. Lima MM, Oliveira MN, Granja F, et al. Lack of association of GSTT1, GSTM1, GSTO1, GSTP1 and CYP1A1 polymorphisms for susceptibility and outcome in Brazilian prostate cancer patients. *Folia Biol*. 2008;54(3):102-108.
27. Longuemaux S, Deloménie C, Gallou C, et al. Candidate genetic modifiers of individual susceptibility to renal cell carcinoma\_ a study of polymorphic human xenobiotic-metabolizing enzymes. *Cancer Res*. 1999;59(12):2903-2908.
28. Fontana L, Delort L, Jomard L, et al. Genetic polymorphisms in CYP1A1, CYP1B1, COMT, GSTP1 and NAT2 genes and association with bladder cancer risk in a French cohort. *Anticancer Res*. 2009;29(5):1631-5.
29. Ma QW, Ling GF, Chen JG, et al. Polymorphism of Glutathione S-transferase T1, M1 and P1 Genes. *Biomed Environ Sci*. 2002;15(3):253-260.

30. Matic M, Pekmezovic T, Djukic T, et al. GSTA1, GSTM1, GSTP1, and GSTT1 polymorphisms and susceptibility to smoking-related bladder cancer: a case-control study. *Urol Oncol*. 2013;31(7):1184-1192.
31. Lavender NA, Benford ML, VanCleave TT, et al. Examination of polymorphic glutathione S-transferase (GST) genes, tobacco smoking and prostate cancer risk among men of African descent: a case-control study. *BMC cancer*. 2009;9:397.
32. Pradubkaew K, Pramyothin P, Limwongse C, et al. Glutathione S-transferase polymorphisms and risk of bladder cancer in Thais. *Thai J Pharm Sci*. 2009;33(2-3):67-73.
33. Qadri Q, Sameer AS, Shah ZA, et al. Genetic polymorphism of the glutathione-S-transferase P1 gene (GSTP1) and susceptibility to prostate cancer in the Kashmiri population. *Genet Mol Res*. 2011;10(4):3038-3045.
34. Zhang R, Xu G, Chen W, Zhang W. Genetic polymorphisms of glutathione S-transferase P1 and bladder cancer susceptibility in a Chinese population. *Genet Test Mol Biomarkers*. 2011;15(1-2):85-88.
35. Safarinejad MR, Shafiei N, Safarinejad SH. Glutathione S-transferase gene polymorphisms (GSTM1, GSTT1, GSTP1) and prostate cancer: a case-control study in Tehran, Iran. *Prostate Cancer Prostatic Dis*. 2011;14(2):105-113.
36. Safarinejad MR, Safarinejad S, Shafiei N, Safarinejad S. Association of genetic polymorphism of glutathione S-transferase (GSTM1, GSTT1, GSTP1) with bladder cancer susceptibility. *Urol Oncol*. 2013;31(7):1193-1203.
37. Ansari SB, Vasudevan R, Bakhshi A, et al. Analysis of glutathione S-transferase (M1, T1 and P1) gene polyorphisms in Iranian prostate



cancer subjects. *Afr J Biotechnol.* 2010;9(43):7230-7235.

38. Srivastava DS, Mandhani A, Mittal B, Mittal RD. Genetic polymorphism of glutathione S-transferase genes (GSTM1, GSTT1 and GSTP1) and susceptibility to prostate cancer in Northern India. *BJU Int.* 2005;95(1):170-173.
39. Sivonova M, Waczulikova I, Dobrota D, et al. Polymorphisms of glutathione-S-transferase M1, T1, P1 and the risk of prostate cancer: a case-control study. *J Exp Clin Cancer Res.* 2009;28:32.
40. Srivastava DS, Mishra DK, Mandhani A, Mittal B, Kumar A, Mittal RD. Association of genetic polymorphism of glutathione S-transferase M1, T1, P1 and susceptibility to bladder cancer. *Eur Urol.* 2005;48(2):339-344.
41. Steinbrecher A, Rohrmann S, Timofeeva M, Risch A, Jansen E, Linseisen J. Dietary glucosinolate intake, polymorphisms in selected biotransformation enzymes, and risk of prostate cancer. *Cancer Epidemio Biomarkers Prev.* 2010;19(1):135-143.
42. Steinhoff C, Franke KH, Golka K, et al. Glutathione transferase isozyme genotypes in patients with prostate and bladder carcinoma. *Arch Toxicol.* 2000;74(9):521-526.
43. Ahmad ST, Arjumand W, Seth A, Kumar Saini A, Sultana S. Impact of glutathione transferase M1, T1, and P1 gene polymorphisms in the genetic susceptibility of North Indian population to renal cell carcinoma. *DNA Cell Biol.* 2012;31(4):636-643.
44. Beer TM, Evans AJ, Hough KM, Lowe BA, McWilliams JE, Henner WD. Polymorphisms of GSTP1 and related genes and prostate cancer risk. *Prostate Cancer Prostatic Dis.* 2002;5(1):22-27.

45. Toruner GA, Akyerli C, Ucar A, et al. Polymorphisms of glutathione S-transferase genes(GSTM1, GSTP1 and GSTT1) and bladder cancer susceptibility in the Turkish population. *Arch Toxicol.* 2001;75(8):459-464.
46. Wadelius M, Autrup JL, Stubbins MJ, et al. Polymorphisms in NAT2, CYP2D6, CYP2C19 and GSTP1 and their association with prostate cancer. *Pharmacogenetics.* 1999;9(3):333-340.
47. Cao W, Cai L, Rao JY, et al. Tobacco smoking, GSTP1 polymorphism, and bladder carcinoma. *Cancer.* 2005;104(11):2400-2408.
48. Wiesenhutter B, Selinski S, Golka K, Bruning T, Bolt HM. Re-assessment of the influence of polymorphisms of phase-II metabolic enzymes on renal cell cancer risk of trichloroethylene-exposed workers. *Int Arch Occup Environ Health.* 2007;81(2):247-251.
49. Xing DL. Association study of polymorphisms in the human drug metabolism enzyme gene and bladder cancer risk. *Zhengzhou University: thesis.* 2006.
50. Xu XX, Cao W, Hou JG, et al. Relationship of GSTP1, RASSF1A polymorphisms and environmental agent with susceptibility to prostate cancer: a case-control study. *Acad J Sec Mil Med Univ.* 2010;31(1):12-17.
51. Wang YL. Relationship between glutathione S-transferase TM1,T1 and P1 polymorphisms and prostate cancer risk in Chinese population. *Chinese Third Military Medical University: thesis,* 2005.
